# Supplementary material for: Self-assembly of porphyrin nanofibers on CeO 2 nanoparticles: an enhanced photocatalyst for organic pollutant degradation under visible light irradiation
Source: Research Square preprint supplement (doi:10.21203/rs.3.rs-6487254/v1), 2025-05-07
Supplement: Supplementary file 1 [file 11330ee9d3c9b5484cd5eda5.docx]

**Electronic Supplementary**

Eco-Friendly Synthesis and Enhanced Photocatalytic Performance of CeO2/Porphyrin Nanocomposites for Organic Pollutant Degradation under Visible Light

Kieu Anh Thi Vo1,2+, Duy Van Lai3,+, Nam Thi Pham1,2, Lam Dai Tran1,2, Thanh Tung Nguyen3, Dinh Ngo Vu4, Duong Duc La5,*

*1Institute for Tropical Technology, Vietnam Academy of Science and Technology, Hanoi, Vietnam*

*2Graduate University of Science and Technology-VAST, Cau Giay, Hanoi, Vietnam*

*3Institute of Materials Science, Vietnam Academy of Science and Technology, 18 Hoang Quoc Viet Street, Cau Giay District, Hanoi City, Vietnam.*

*4Electric Power University, 235 Hoang Quoc Viet St, Bac Tu Liem Dist, Hanoi, Vietnam*

*5Institute of Chemistry and Materials, 17 Hoang Sam, Nghia Do, Cau Giay, Hanoi, Vietnam*

+ These authors contributed equally

* Corresponding authors: duc.duong.la@gmail.com


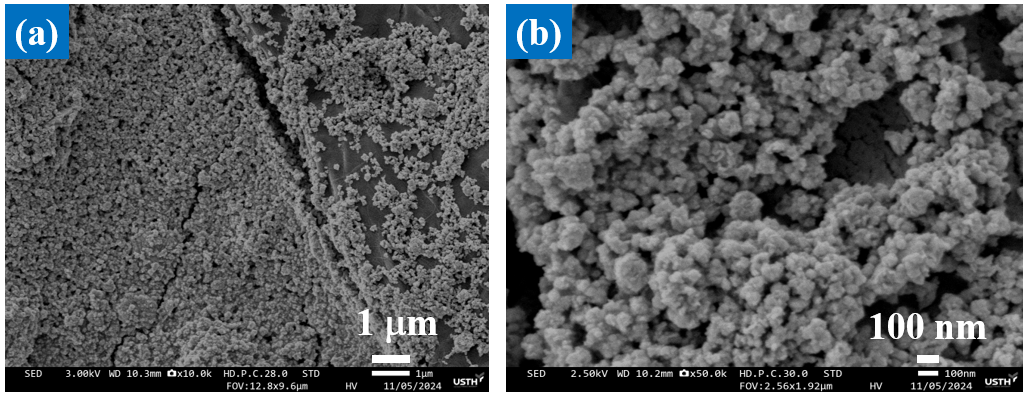


Figure S1. SEM image of pure CeO2 nanoparticles.


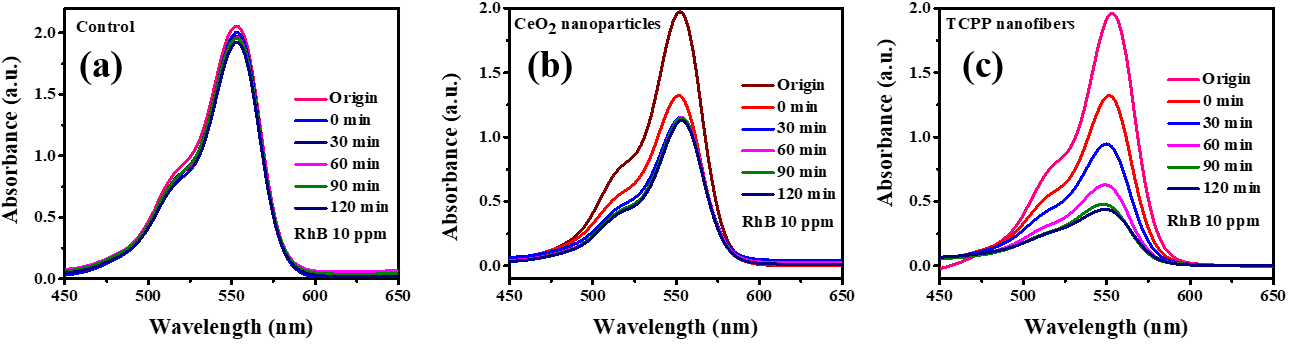


Figure S2. (a) Adsorption kinetics over time, (b) Photocatalytic degradation performance, and (c) First-order kinetic analysis for the control sample, CeO2 nanoparticles, and TCPP nanofibers under simulated sunlight exposure for 120 minutes.


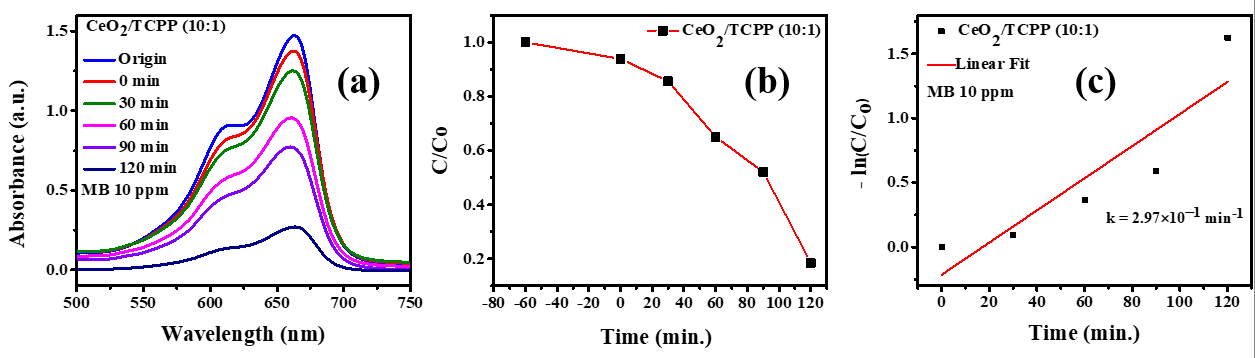


Figure S3. (a) Time-dependent removal of Rhodamine B (RhB) using CeO2/TCPP nanocomposite, (b) Adsorption and photodegradation kinetics of RhB, and (c) Kinetic study under simulated sunlight over a 120-minute period.
